# Supplementary material
Source: PubMed Central journal article supplement (PMC556009)

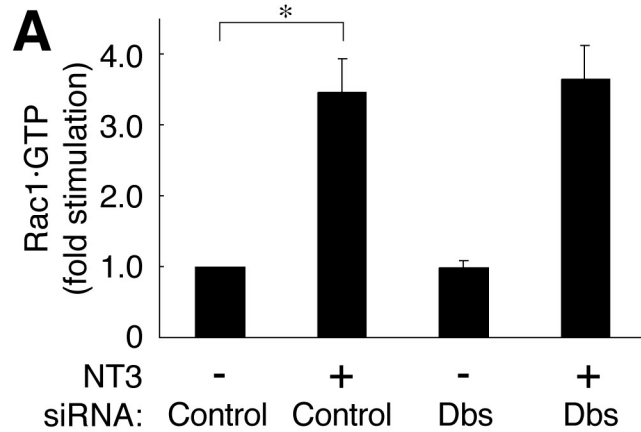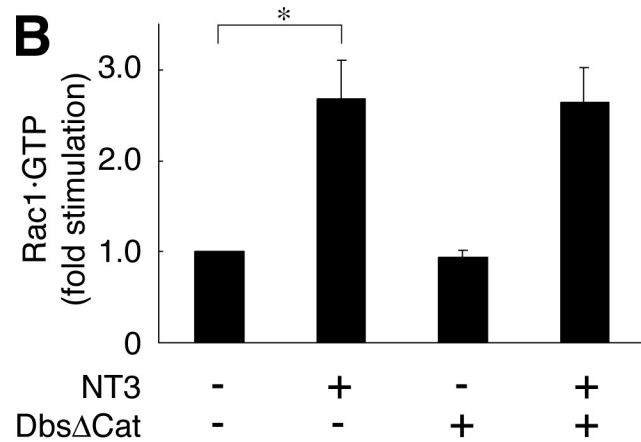

Supplement: pnas_102_14_5198__1.pdf [file pnas_102_14_5198__1.pdf]

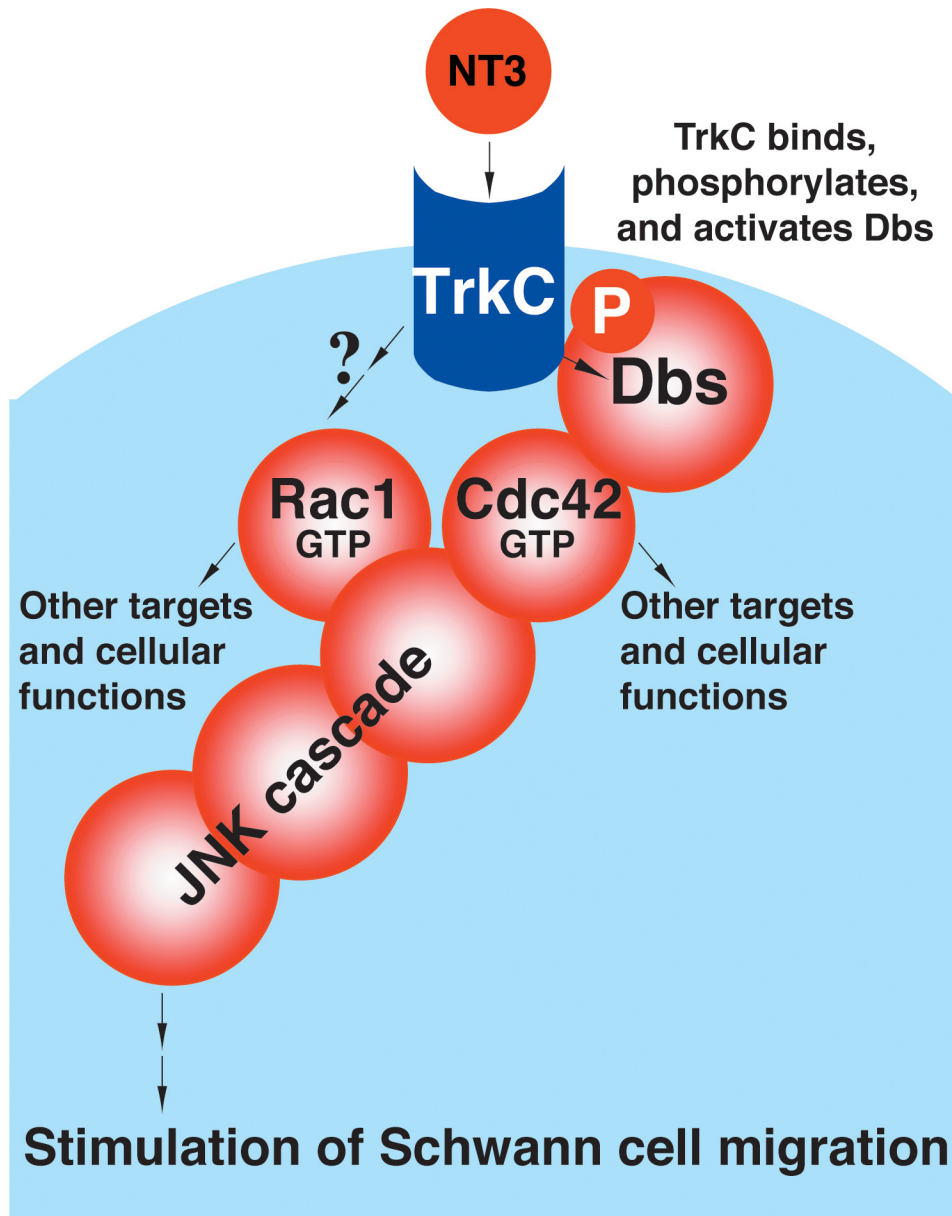

Supplement: pnas_102_14_5198__2.pdf [file pnas_102_14_5198__2.pdf]

**Control siRNA**

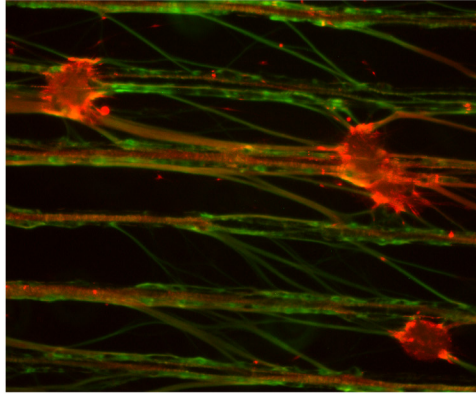

**Dbx siRNA**

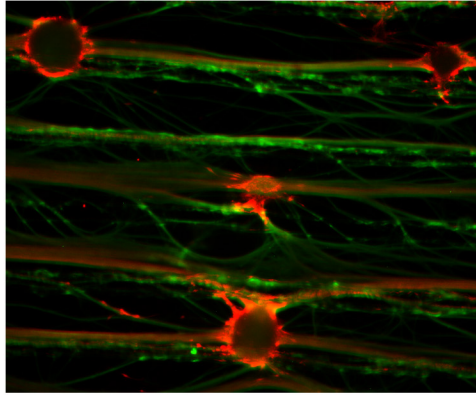

**NT3**

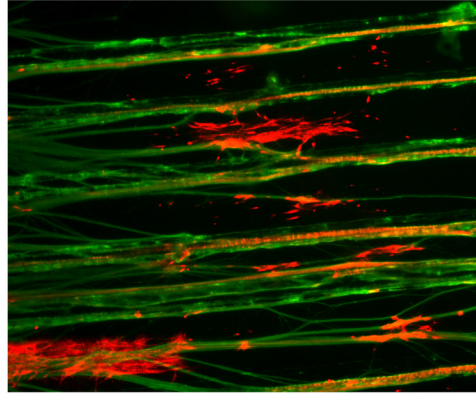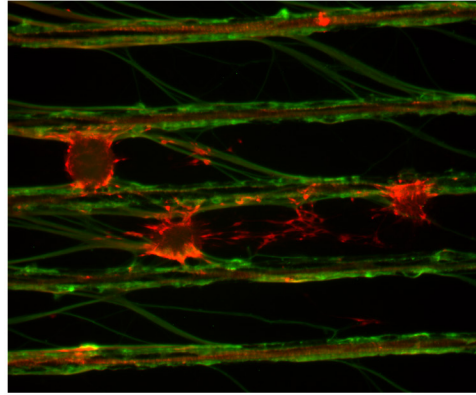

Supplement: pnas_102_14_5198__4.pdf [file pnas_102_14_5198__4.pdf]
